# Supplementary material
Source: PubMed Central journal article supplement (PMC5564041)
Supplement: Supp_Figure2.pdf [file Supp_Figure2.pdf]

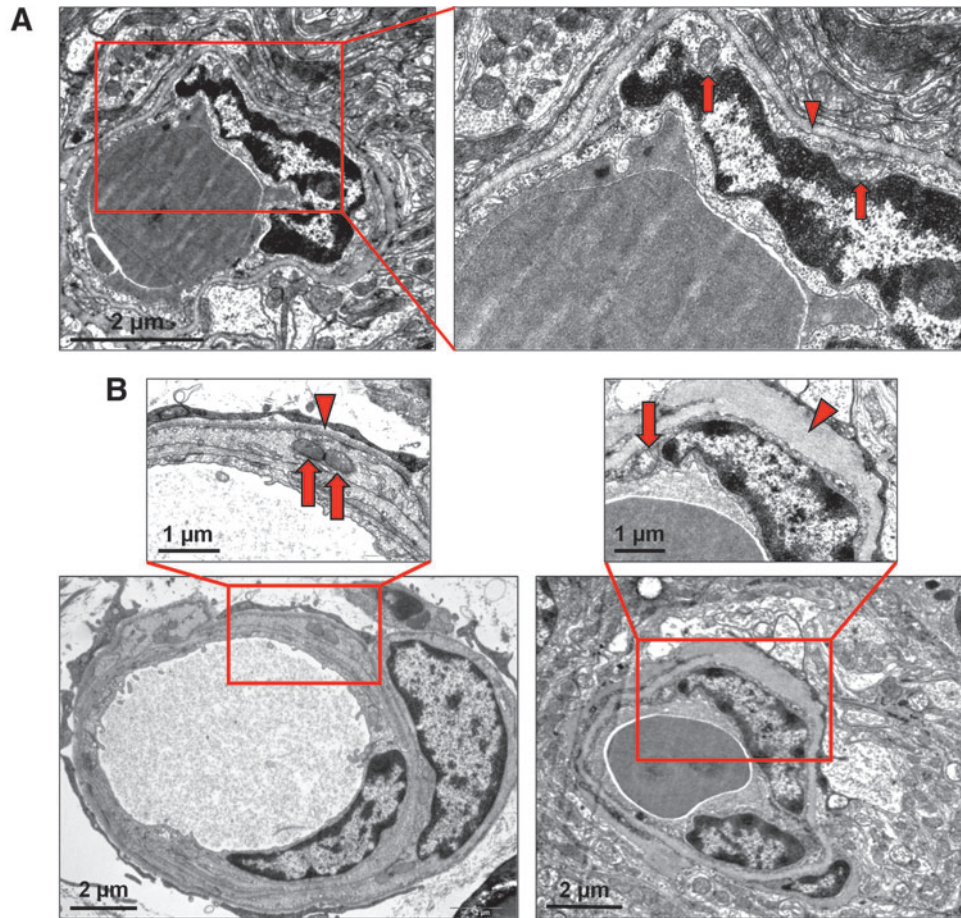

**SUPPLEMENTARY FIG. S2. Comparison of capillaries from the stria vascularis and spiral ganglion in the KO cochlea.** (A) Strial capillary from a WT mouse. The capillary wall consists of normal mitochondria (*arrows*) and a basal lamina (*arrowhead*) of normal thickness, and is surrounded by an intricate network of marginal/intermediate cell processes containing many mitochondria. (B) *Left*, capillary from the spiral ganglion of a KO cochlea; *right*, capillary from the stria vascularis of a KO cochlea. While the spiral ganglion capillary shows no visible pathological changes, the strial capillary is grossly abnormal, with an occluded lumen, abnormal mitochondria (*arrow*), and an abnormally thick basal lamina (*arrowhead*).
